# Supplementary material for: Impact of Psoriasis on Mortality Rate and Outcome in Myocardial Infarction
Source: PubMed Central journal article supplement — J Am Heart Assoc. 2020 Sep 11;9(18):e016956. doi: 10.1161/JAHA.120.016956 (PMC7726965; doi:10.1161/jaha.120.016956), 2020-09-11
Supplement: JAH3-9-e016956-s001.pdf [file JAH3-9-e016956-s001.pdf]

# **Supplemental Material**

**Table S1. Annual time trends regarding patient characteristics of MI patients with psoriasis 2005-2016 in Germany.**

|                                                           | 2005  | 2016  | $\beta$ -estimate (95% CI) | P-value          |
|-----------------------------------------------------------|-------|-------|----------------------------|------------------|
| Age $\geq$ 70 years                                       | 37.8% | 39.1% | 0.15 (0.01 to 0.30)        | <b>0.037</b>     |
| <b>Traditional cardiovascular risk factors</b>            |       |       |                            |                  |
| Obesity                                                   | 24.5% | 15.1% | -0.59 (-0.78 to -0.41)     | <b>&lt;0.001</b> |
| Smoking                                                   | 18.6% | 13.5% | -0.08 (-0.08 to -0.08)     | <b>&lt;0.001</b> |
| Essential arterial hypertension                           | 59.8% | 60.9% | 0.08 (-0.06 to 0.23)       | 0.273            |
| Hyperlipidemia                                            | 40.2% | 47.3% | 0.21 (0.06 to 0.35)        | <b>0.005</b>     |
| Diabetes mellitus                                         | 37.3% | 33.5% | -0.01 (-0.16 to 0.14)      | 0.898            |
| <b>Myocardial infarction subtype</b>                      |       |       |                            |                  |
| NSTEMI                                                    | 41.6% | 68.1% | 1.05 (0.90 to 1.19)        | <b>&lt;0.001</b> |
| <b>Comorbidities</b>                                      |       |       |                            |                  |
| Peripheral artery disease                                 |       |       |                            |                  |
| Cancer                                                    | 4.8%  | 2.9%  | -0.28 (-0.65 to 0.10)      | 0.146            |
| Atrial fibrillation/flutter                               | 17.6% | 24.8% | 0.53 (0.36 to 0.70)        | <b>&lt;0.001</b> |
| Chronic obstructive pulmonary disease                     | 10.9% | 11.9% | 0.32 (0.11 to 0.53)        | <b>0.003</b>     |
| Renal insufficiency (GFR <60 ml/min/1.73 m <sup>2</sup> ) | 5.0%  | 17.9% | 1.15 (0.95 to 1.34)        | <b>&lt;0.001</b> |

**Table S2. Annual time trends regarding in-hospital events of MI patients with psoriasis 2005-2016 in Germany.**

|                                            | <b>2005</b> | <b>2016</b> | <b><math>\beta</math>-estimate (95% CI)</b> | <b>P-value</b>   |
|--------------------------------------------|-------------|-------------|---------------------------------------------|------------------|
| In-hospital death                          | 7.7%        | 4.9%        | -0.02 (-0.30 to 0.26)                       | 0.894            |
| Pneumonia                                  | 8.9%        | 14.3%       | 0.59 (0.37 to 0.80)                         | <b>&lt;0.001</b> |
| Deep venous thrombosis or thrombophlebitis | 0.9%        | 1.5%        | 0.65 (-0.09 to 1.38)                        | 0.083            |
| Pulmonary embolism                         | 0.9%        | 0.5%        | -0.48 (-1.31 to 0.35)                       | 0.256            |
| Recurrent myocardial infarction            | 2.3%        | 0.4%        | -1.85 (-2.65 to -1.05)                      | <b>&lt;0.001</b> |
| Stroke                                     | 2.0%        | 3.4%        | 0.31 (-0.12 to 0.73)                        | 0.159            |
| Acute kidney injury                        | 3.1%        | 9.2%        | 1.32 (1.03 to 1.62)                         | <b>&lt;0.001</b> |
| Intracerebral bleeding                     | 0.5%        | 0.6%        | 0.28 (-0.83 to 1.40)                        | 0.618            |
| Gastro-intestinal bleeding                 | 2.7%        | 1.0%        | -0.44 (-1.03 to 0.16)                       | 0.148            |

**Table S3. Annual time trends regarding interventional treatments of MI patients with psoriasis 2005-2016 in Germany (the percentages were always related to all MI patients with psoriasis).**

|                                    | <b>2005</b> | <b>2016</b> | <b><math>\beta</math>-estimate (95% CI)</b> | <b>P-value</b>   |
|------------------------------------|-------------|-------------|---------------------------------------------|------------------|
| Cardiac catheter                   | 47.1%       | 64.7%       | 0.75 (0.61 to 0.89)                         | <b>&lt;0.001</b> |
| Percutaneous coronary intervention | 36.2%       | 52.3%       | 0.72 (0.57 to 0.86)                         | <b>&lt;0.001</b> |
| Bare metal stent                   | 27.3%       | 1.8%        | -2.22 (-2.40 to -2.03)                      | <b>&lt;0.001</b> |
| Drug eluting Stent                 | 6.8%        | 47.7%       | 2.68 (2.52 to 2.84)                         | <b>&lt;0.001</b> |
| Bioresorbable vascular scaffold    | 0.0%        | 0.7%        | 3.93 (2.63 to 5.23)                         | <b>&lt;0.001</b> |
| Coronary-artery bypass graft       | 7.0%        | 9.7%        | 0.40 (0.13 to 0.66)                         | <b>0.004</b>     |

For example: While cardiac catheter was performed in 64.7% of the MI patients with psoriasis, drug eluting stent implantation was done in 47.7% of the MI patients with psoriasis.)

Figure S1. Flowchart.

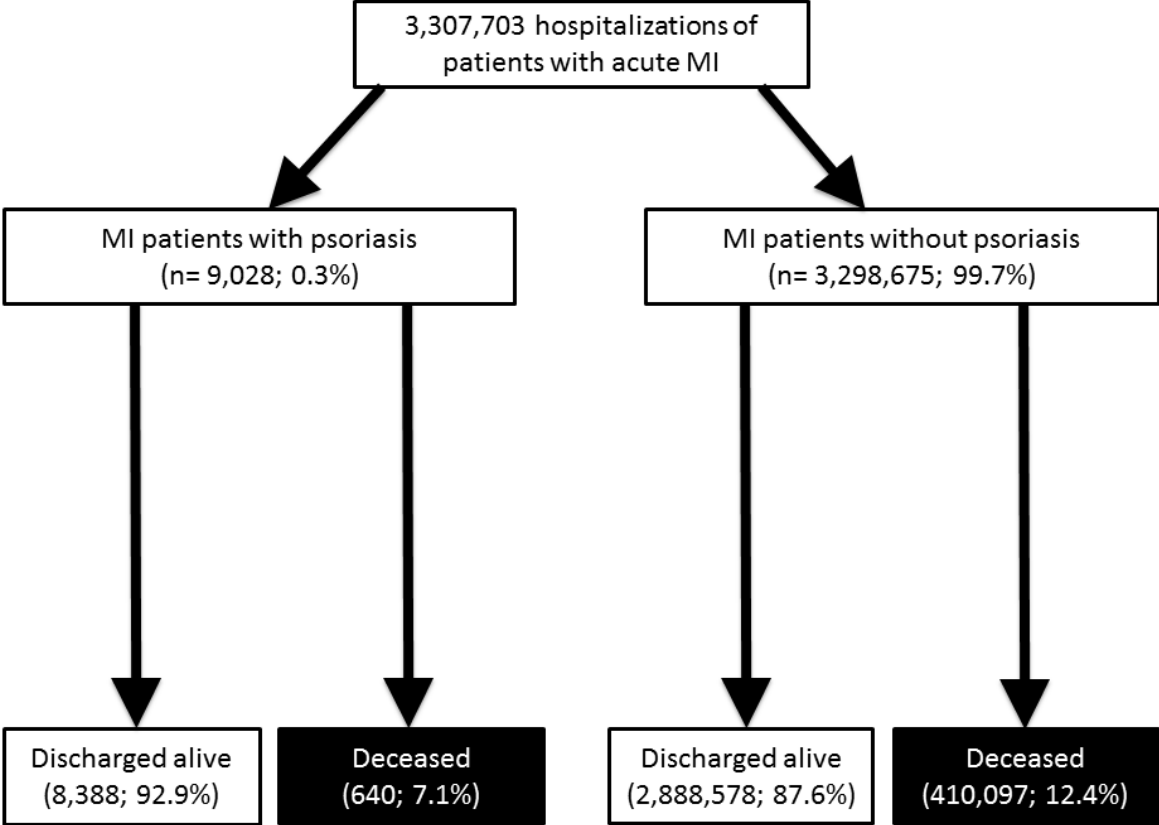

**Figure S2. Temporal trend on cardiovascular risk factors and comorbidities in MI patients with psoriasis.**

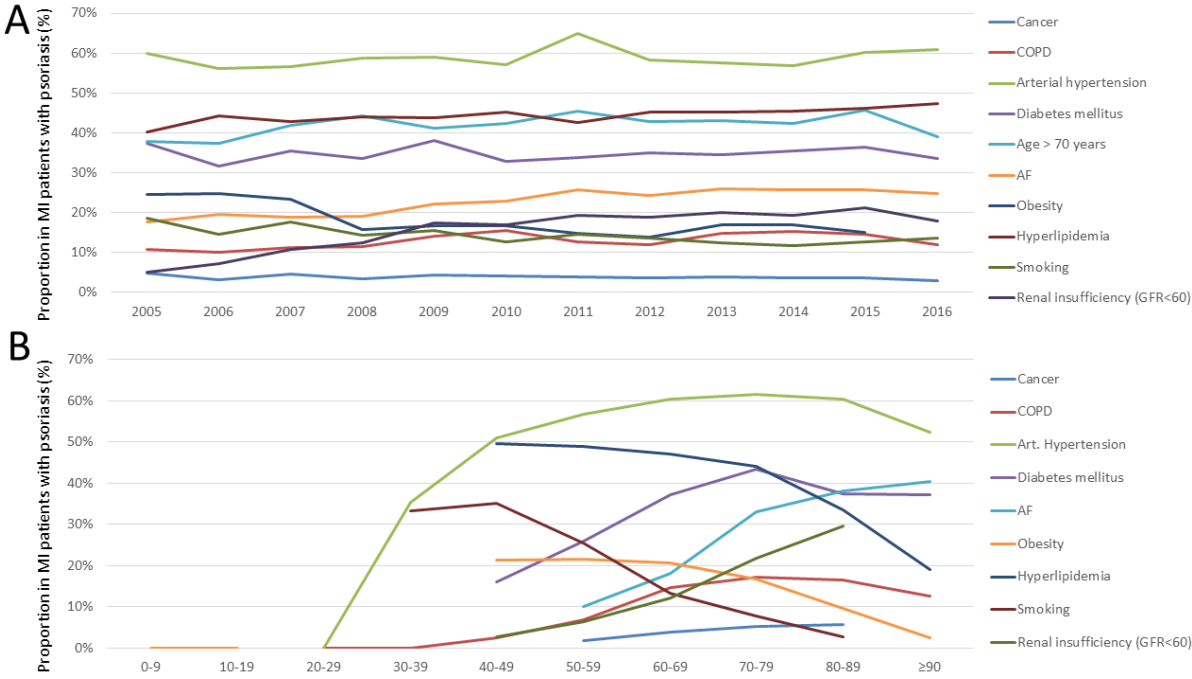

A: Temporal trends between the years 2005 and 2016.

B: Temporal trends stratified by age-decades (cumulative 2005-2016).

**Figure S3. Temporal trends on in-hospital adverse events.**

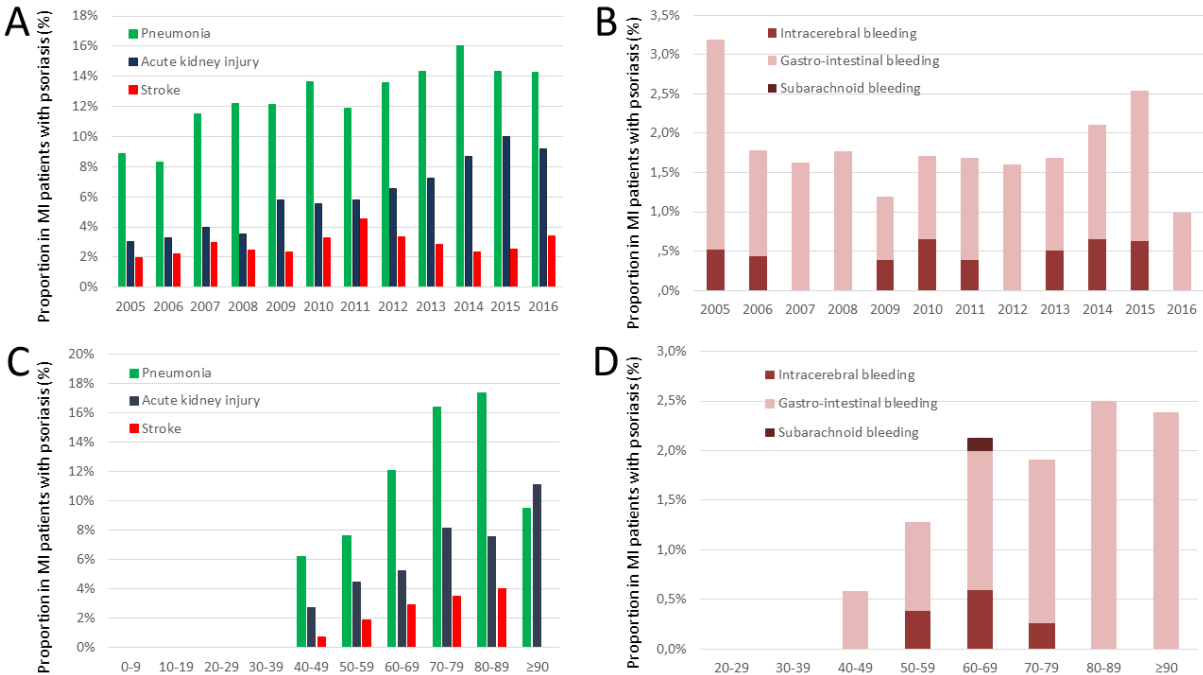

A: Temporal trends on pneumonia (green bars), acute kidney injury (blue bars) and stroke (red bars) in MI patients with psoriasis from 2005 to 2016 in Germany.

B: Temporal trends on intracerebral bleeding (mid-red bars), gastro-intestinal bleeding (light-red bars) and subarachnoid bleeding (dark-red bars) in MI patients with psoriasis from 2005 to 2016 in Germany.

C: Temporal trends on pneumonia (green bars), acute kidney injury (blue bars) and stroke (red bars) in MI patients with psoriasis stratified for age-decades (cumulative 2005-2016).

D: Temporal trends on intracerebral bleeding (mid-red bars), gastro-intestinal bleeding (light-red bars) and subarachnoid bleeding (dark-red bars) in MI patients with psoriasis stratified for age-decades (cumulative 2005-2016).
